# Supplementary material for: Prophylactic intervention of probiotics (L.acidophilus, L.rhamnosus GG) and celecoxib modulate Bax-mediated apoptosis in 1,2-dimethylhydrazine-induced experimental colon carcinogenesis
Source: Springer Nature journal article supplement (doi:10.1186/s12885-018-4999-9), 2018-11-13
Supplement: MOESM1 [file 16269796]

# Parameters For Long term study:

1

(E)

1. Estimation of tumor incidence, burden, and multiplicity.

→ cervical Dislocation

↓

Colon resected  
and changed and  
examined for tumor

⇒ Tumor incidence = percentage of animals with tumors

⇒ Tumor burden =  $\frac{\text{number of tumors counted}}{\text{total number of animals}}$

⇒ Tumor multiplicity =  $\frac{\text{Total no. of tumors counted}}{\text{Tumor bearing animals}}$

Tumor incidence : 100%

Tumor burden :

① control : 0

Tumor burden : 0

② LA+DMH+Drug:

~ :  $\frac{21}{6} = 3.5$

Tumor multiplicity : 0

③ LGA+DMH+Drug:

~ :  $\frac{14}{6} = 2.3$

~ : 3.5

④ LA+LGA+DMH+Drug:

~ :  $\frac{19}{6} = 3.16$

~ : 2.3

⑤ LA+GGA+Drug

~ : 0

~ : 3-16

⑥ DMH

~ :  $\frac{35}{6} = 5.8$

~ : 0

~ : 5.8
